# Supplementary material for: Rapid and accurate identification and differentiation of Mycobacterium tuberculosis and non-tuberculous mycobacteria using PCR kits available in a high-burden setting
Source: Front Public Health. 2024 Apr 2;12:1358261. doi: 10.3389/fpubh.2024.1358261 (PMC11018931; doi:10.3389/fpubh.2024.1358261)
Supplement: Supplementary file 1 [file Data_Sheet_1.xlsx]

## Sheet: MTB CULTURES
							SANSURE - Mycobacterium Multiplex Nucleic Acid Diagnostic Kit
		MTBC+NTM KIT					CT ≤ 39	69.5 +/- 1°C	CT ≤ 39	67 +/- 1°C	CT ≤ 39	70.5 +/- 1°C	CT ≤ 39	68 +/- 1°C
		16S	IS6110+IS1081	TBd1	IC		M. kansasii	M. abscessus abs	M. avium	M. tuberculosis	M. fortuitum	M. intracellulare	Internal CTRL	M. abscessus mass
#	ID	Ct ROX	Ct FAM	Ct Cy5	Ct HEX	Results	Ct FAM	Melt FAM	Ct HEX	Melt HEX	Ct ROX	Melt ROX	Ct Cy5	Melt Cy5	Results
1	G1 TB	13.12	12.51	15.09	23.81	M. tuberculosis	-	-	-	66.3	-	-	29.6907	-	M. tuberculosis
2	G2 TB	12.87	9.93	14.23	24.34	M. tuberculosis	-	-	-	66.2	-	-	30.176	-	M. tuberculosis
3	G3 TB	17.17	16.33	18.53	23	M. tuberculosis	-	-	-	65.9	-	-	29.9384	-	M. tuberculosis
4	G4 TB	11.81	9.08	13.15	26.09	M. tuberculosis	-	-	-	66	-	-	38.205	-	M. tuberculosis
5	G5 TB	11.99	11.3	13.29	25.48	M. tuberculosis	-	-	-	66.4	-	-	38.5936	-	M. tuberculosis
6	G6 TB	12.56	9.81	14.19	24.47	M. tuberculosis	-	-	-	66.2	-	-	31.1941	-	M. tuberculosis
7	G7 TB	12.77	9.89	14.35	25.18	M. tuberculosis	-	-	-	66.5	-	-	38.9704	-	M. tuberculosis
8	G8 TB	13.88	11.41	15.63	23.73	M. tuberculosis	-	-	-	66.2	-	-	37.4508	-	M. tuberculosis
9	G9 TB	15.52	13.59	17.14	22.86	M. tuberculosis	-	-	-	66.2	-	-	29.1186	-	M. tuberculosis
10	G10 TB	10.33	7.23	10.97	34.51	M. tuberculosis	-	-	-	66.5	-	-	32.3321	-	M. tuberculosis
11	G11 TB	15.18	13.07	17.55	23.02	M. tuberculosis	-	-	-	66.5	-	-	36.9356	-	M. tuberculosis
12	G12 TB	14.43	12.32	16.1	23.43	M. tuberculosis	-	-	-	66.5	-	-	30.3327	-	M. tuberculosis
13	G13 TB	11.52	8.88	13.41	25.56	M. tuberculosis	-	-	-	66.2	-	-	37.4798	-	M. tuberculosis
14	G14 TB	11.45	10.63	12.92	27.24	M. tuberculosis	-	-	-	66.5	-	-	37.5121	-	M. tuberculosis
15	G15 TB	14.32	11.87	16.6	23.2	M. tuberculosis	-	-	-	66.3	-	-	29.0122	-	M. tuberculosis
16	G16 TB	16.48	15.69	18.3	23.01	M. tuberculosis	-	-	-	66.2	-	-	28.337	-	M. tuberculosis
17	G17 TB	15.21	14.62	17.04	23.17	M. tuberculosis	-	-	-	66.2	-	-	28.0226	-	M. tuberculosis
18	G18 TB	12.62	9.88	14.68	24.21	M. tuberculosis	-	-	-	66.5	-	-	38.6878	-	M. tuberculosis
19	G19 TB	17.24	14.76	18.58	22.83	M. tuberculosis	-	-	-	66.2	-	-	29.4971	-	M. tuberculosis
20	G20 TB	13.23	10.69	14.56	24.51	M. tuberculosis	-	-	-	66.2	-	-	31.1975	-	M. tuberculosis
21	G21 TB	14.42	12.09	16.65	23.02	M. tuberculosis	-	-	-	66.6	-	-	27.5142	-	M. tuberculosis
22	G22 TB	17.79	17.21	19.56	23	M. tuberculosis	-	-	-	66.2	-	-	27.5583	-	M. tuberculosis
23	G23 TB	16.08	13.55	18.29	22.79	M. tuberculosis	-	-	-	66.1	-	-	29.7446	-	M. tuberculosis
24	G24 TB	16.71	15.93	18.4	22.99	M. tuberculosis	-	-	-	66.5	-	-	37.079	-	M. tuberculosis
25	G25 TB	12.49	10.29	13.8	25	M. tuberculosis	-	-	-	65.9	-	-	37.2567	-	M. tuberculosis
26	G26 TB	14.82	11.67	16.71	23.66	M. tuberculosis	-	-	-	66.2	-	-	37.9957	-	M. tuberculosis
27	G27 TB	17.25	14.92	19.08	23.29	M. tuberculosis	-	-	-	66.5	-	-	37.1812	-	M. tuberculosis
28	G28 TB	18.39	17.75	19.85	23.21	M. tuberculosis	-	-	-	66.3	-	-	36.8157	-	M. tuberculosis
29	G29 TB	16.39	14.2	18.21	23.06	M. tuberculosis	-	-	-	66.1	-	-	29.0264	-	M. tuberculosis
30	G30 TB	15.85	13.33	17.93	23.06	M. tuberculosis	-	-	-	66.6	-	-	36.9995	-	M. tuberculosis
31	G31 TB	16.24	13.6	18.3	23.07	M. tuberculosis	-	-	-	66	-	-	36.7768	-	M. tuberculosis
32	G32 TB	14.26	11.55	15.93	23.51	M. tuberculosis	-	-	-	66.5	-	-	29.5133	-	M. tuberculosis
33	G33 TB	15.44	15.48	16.11	23.76	M. tuberculosis	-	-	-	66.1	-	-	27.8979	-	M. tuberculosis
34	G34 TB	16.59	14.28	18.44	22.9	M. tuberculosis	-	-	-	66.6	-	-	28.6449	-	M. tuberculosis
35	G35 TB	14.54	13.79	16.51	23.56	M. tuberculosis	-	-	-	66.1	-	-	38.8308	-	M. tuberculosis
36	G36 TB	12.99	10.63	14.44	24.32	M. tuberculosis	-	-	-	66.3	-	-	38.83	-	M. tuberculosis
37	G37 TB	14.23	13.2	15.64	24.57	M. tuberculosis	-	-	-	66.4	-	-	38.821	-	M. tuberculosis
38	G38 TB	14.4	11.18	16.49	23.48	M. tuberculosis	-	-	-	66.2	-	-	37.7968	-	M. tuberculosis
39	G39 TB	16.48	14.16	18.44	22.83	M. tuberculosis	-	-	-	66.4	-	-	28.6832	-	M. tuberculosis
40	G40 TB	16.26	13.66	18.37	22.86	M. tuberculosis	-	-	-	66.2	-	-	37.7416	-	M. tuberculosis
41	G41 TB	12.58	9.9	14.47	24.41	M. tuberculosis	-	-	-	66.3	-	-	38.2288	-	M. tuberculosis
42	G42 TB	14.46	11	28.2	23.65	M. tuberculosis	-	-	-	65.9	-	-	38.2736	-	M. tuberculosis
43	G43 TB	16.21	13.98	18.24	23.02	M. tuberculosis	-	-	-	66.2	-	-	37.6223	-	M. tuberculosis
44	G44 TB	15.31	13.31	17.49	23.14	M. tuberculosis	-	-	-	66.6	-	-	29.6653	-	M. tuberculosis
45	G45 TB	13.66	10.57	15.27	26.79	M. tuberculosis	-	-	-	66.6	-	-	37.7091	-	M. tuberculosis
46	G46 TB	14.56	12.55	16.5	23.39	M. tuberculosis	-	-	-	66.5	-	-	29.4286	-	M. tuberculosis
47	G47 TB	16.04	13.44	17.64	22.94	M. tuberculosis	-	-	-	66.5	-	-	30.4185	-	M. tuberculosis
48	G48 TB	13.27	11.19	14.68	24.03	M. tuberculosis	-	-	-	66	-	-	29.9784	-	M. tuberculosis
49	G49 TB	13.61	10.69	15.19	23.78	M. tuberculosis	-	-	-	66	-	-	30.0534	-	M. tuberculosis
50	G50 TB	14.72	12.65	16.12	23.37	M. tuberculosis	-	-	-	66.3	-	-	30.4496	-	M. tuberculosis

## Sheet: NTM CULTURES
	MALDITOF						Sansure - Mycobacterium Multiplex Nucleic Acid Diagnostic Kit
		MTBC+NTM KIT					CT ≤ 39	69.5 +/- 1°C	CT ≤ 39	67 +/- 1°C	CT ≤ 39	70.5 +/- 1°C	CT ≤ 39	68 +/- 1°C
		16S	IS6110+IS1081	TBd1	IC		M. kansasii	M. abscessus abs	M. avium	M. tuberculosis	M. fortuitum	M. intracellulare	Internal CTRL	M. abscessus mass
ID INSPI	ID	Ct ROX	Ct FAM	Ct Cy5	Ct HEX	Results	Ct FAM	Melt FAM	Ct HEX	Melt HEX	Ct ROX	Melt ROX	Ct Cy5	Melt Cy5	Results
1	Mycobacterium abscessus	23.62	-	-	24.17	NTM	-	68.9	-	-	-	-	29.0303	-	M. abscessus abs
2	Mycobacterium abscessus	23.97	-	-	24.07	NTM	-	69	-	-	-	-	29.658	-	M. abscessus abs
3	Mycobacterium abscessus	23.36	-	-	24.29	NTM	-	68.5	-	-	-	-	29.9534	-	M. abscessus abs
4	Mycobacterium abscessus	23.45	-	-	23.19	NTM	-	69.2	-	-	-	-	30.0841	-	M. abscessus abs
5	Mycobacterium abscessus	24.9	-	-	23.98	NTM	-	68.6	-	-	-	-	28.9891	-	M. abscessus abs
6	Mycobacterium fortuitum	32.7	33.62	-	23.75	MTBC	-	-	-	-	-	-	36.5668	-	-
7	Mycobacterium farcinogenes	24.98	-	-	24.1	NTM	-	-	-	-	-	-	36.592	-	-
8	Mycobacterium farcinogenes	24.73	-	-	24.09	NTM	-	-	-	-	-	-	36.7132	-	-
9	Mycobacterium farcinogenes	27.46	-	-	25.19	NTM	-	-	-	-	-	-	36.6635	-	-
10	Mycobacterium farcinogenes	27.13	-	-	25.55	NTM	-	-	-	-	-	-	29.8249	-	-
11	Mycobacterium farcinogenes	25.13	-	-	24.45	NTM	-	-	-	-	-	-	29.8971	-	-
12	Mycobacterium fortuitum	25.98	-	-	24.2	NTM	-	-		-	20.1214	-	29.5085	-	M. fortuitum
13	Mycobacterium fortuitum	32.71	-	-	24.34	NTM	-	-	-	-	-	-	35.5613	-	-
14	Mycobacterium abscessus	21.01	-	-	24.21	NTM	-	-	-	-	-	-	36.5277	-	-
15	Mycobacterium abscessus	24.15	-	-	23.46	NTM	-	-	-	-		-	28.6624	-	-
16	Mycobacterium abscessus	27.24	-	-	23.93	NTM	-	-	-	-	-	-	28.7952	-	-
17	Mycobacterium abscessus	23.68	-	-	24.09	NTM	-	-	-	-	-	-	35.7708	-	-
18	Mycobacterium abscessus	22.98	-	-	24.35	NTM	-	-	-	-	-	-	27.8958	-	-
19	Mycobacterium abscessus	21.21	-	-	22.53	NTM	-	-	-	-		-	35.2024	-	-
20	Mycobacterium fortuitum	31.11	-	-	22.43	NTM	-	68.9	-	-	-	-	28.2356	-	M. abscessus abs
21	Mycobacterium abscessus	23.73	-	-	23.97	NTM	-	68.6	-	-	-	-	29.5735	-	M. abscessus abs
22	Mycobacterium abscessus	24.41	-	-	25.07	NTM	-	68.9	-	-	-	-	29.9318	-	M. abscessus abs
23	Mycobacterium abscessus	23.05	-	-	22.44	NTM	-	69.3	-	-	-	-	36.5596	-	M. abscessus abs
24	Mycobacterium abscessus	23.05	-	-	24.02	NTM	-	68.8	-	-	-	-	36.7788	-	M. abscessus abs
25	Mycobacterium fortuitum	-	36.37	-	22.99	MTBC	-	-	-	-	-	-	37.3583	-	-
26	Mycobacterium abscessus	23.2	-	-	23.01	NTM	-	69.2	-	-	-	-	30.3412	-	M. abscessus abs
27	Mycobacterium abscessus	22.6	-	-	23.51	NTM	-	68.8	-	-	-	-	36.6966	-	M. abscessus abs
28	Mycobacterium abscessus	22.51	-	-	23.59	NTM	-	68.9	-	-	-	-	29.4674	-	M. abscessus abs
29	Mycobacterium fortuitum	31.38	-	-	23.5	NTM	-	-	-	-	28.6418	-	29.4154	-	M. fortuitum
30	Mycobacterium fortuitum	31.41	-	-	23.41	NTM	-	-	-	-	27.6136	-	29.4513	-	M. fortuitum
31	Mycobacterium fortuitum	30.64	-	-	25.72	NTM	-	-	-	-	23.0828	-	29.7043	-	M. fortuitum
32	Mycobacterium fortuitum	30.27	-	-	23.2	NTM	-	-	-	-	27.2653	-	29.6163	-	M. fortuitum
33	Mycobacterium fortuitum	32.37	-	-	25.04	NTM	-	-	-	-	27.6888	-	29.7646	-	M. fortuitum
34	Mycobacterium abscessus	21.45	-	-	23.57	NTM	-	68.7	-	-	-	-	29.3742	-	M. abscessus abs
35	Mycobacterium abscessus	25.37	-	-	24.05	NTM	-	69	-	-	-	-	29.2567	-	M. abscessus abs
36	Mycobacterium abscessus	22.83	-	-	23.67	NTM	-	68.8	-	-	-	-	29.0519	-	M. abscessus abs
37	Mycobacterium fortuitum	21.79	-	-	23.73	NTM	-	70.2	-	-		-	36.2399	-	M. abscessus abs
38	Mycobacterium abscessus	21.75	-	-	23.72	NTM	-	68.7	-	-	-	-	36.1629	-	M. abscessus abs
39	Mycobacterium abscessus	23.12	-	-	23.79	NTM	-	69	-	-	-	-	36.8188	-	M. abscessus abs
40	Mycobacterium abscessus	21.71	-	-	24.06	NTM	-	68.9	-	-	-	-	36.4634	-	M. abscessus abs
41	Mycobacterium abscessus	21.28	-	-	23.75	NTM	-	69.2	-	-	-	-	29.2777	-	M. abscessus abs
42	Mycobacterium abscessus	21.6	-	-	23.75	NTM	-	68.7	-	-	-	-	30.0112	-	M. abscessus abs
43	Mycobacterium fortuitum	-	36.92	-	23.29	MTBC	-	-	-	-	-	-	36.3734	-	-
44	Mycobacterium abscessus	23.72	-	-	23.78	NTM	-	68.9	-	-	-	-	37.7016	-	M. abscessus abs
45	Mycobacterium abscessus	23.83	-	-	23.28	NTM	-	68.6	-	-	-	-	29.446	-	M. abscessus abs
46	Mycobacterium abscessus	24.86	-	-	23.23	NTM	-	69	-	-	-	-	29.6846	-	M. abscessus abs
47	Mycobacterium farcinogenes	22.8	-	-	23.42	NTM	-	-	-	-	-	-	30.2057	-	-
48	Mycobacterium farcinogenes	22.74	-	-	23.73	NTM	-	-	-	-	-	-	30.1056	-	-
49	Mycobacterium farcinogenes	22.67	-	-	23.66	NTM	-	-	-	-	-	-	29.4364	-	-
50	Mycobacterium farcinogenes	20.27	-	-	23.4	NTM	-	-	-	-	-	-	36.555	-	-
51	Mycobacterium fortuitum	15.14	-	-	-	NTM	-	-	-	-	16.3	-	31.39	-	M. fortuitum
52	Mycobacterium novocastrense	15.19	-	-	-	NTM	-	-	-	-	-	-	30.99	-	-
53	Mycobacterium parafortuitum	16.83	-	-	-	NTM	-	-	-	-	-	-	30.7	-	-
54	Mycobacterium fortuitum	17.2	-	-	-	NTM	-	-	-	-	17.79	-	31.35	-	M. fortuitum
55	Mycobacterium fortuitum	17.87	-	-	-	NTM	-	-	-	-	18.55	-	30.8	-	M. fortuitum
56	Mycobacterium fortuitum	17.15	-	-	-	NTM	-	-	-	-	18.16	-	31.21	-	M. fortuitum
57	Mycobacterium fortuitum	14.67	-	-	-	NTM	-	-	-	-	16.05	-	-	-	M. fortuitum
58	Mycobacterium fortuitum	17.8	-	-	-	NTM	-	-	-	-	-	-	31.04	-	-
59	Mycobacterium fortuitum	13.74	-	-	-	NTM	-	-	-	-	14.59	-	31.33	-	M. fortuitum
